# Supplementary material for: Consumer Preferences and Willingness to Pay for Clams with Sustainability Certification in Mediterranean Countries
Source: MDPI journal article supplement (doi:10.3390/su151511953), 2023-08-03
Supplement: s1 [file s1]

Archive with 2 entries (2 files):
- Supplementary File S1.pdf
- Supplementary File S2.pdf
