# Supplementary material for: Consumer Preferences and Willingness to Pay for Clams with Sustainability Certification in Mediterranean Countries
Source: MDPI journal article supplement (doi:10.3390/su151511953), 2023-08-03
Supplement: s1 [file s1 › Supplementary File S2.pdf]

Taking into consideration the seafood products you usually buy, please answer the following questions as realistically as possible.

Previous studies indicate that, in general, people report acting differently in surveys than they do in real life. Indeed, it is quite common to find that individuals say they are willing to pay higher prices than they are willing to pay. It is believed that this is due to the difficulty of calculating the real impact of these higher expenses on the family budget. Basically, it's easy to be generous when we don't have to pay. We would therefore like to remind you that it is perfectly fine if you are not willing to pay a higher-than-average price or not to buy any of the alternatives proposed.
